# Supplementary material for: Bis(2-oxoindolin-3-ylidene)-benzodifuran-dione-based D–A polymers for high-performance n-channel transistors
Source: Royal Society of Chemistry journal article supplement (doi:10.1039/c4py01683a), 2015-01-01
Supplement: c4py01683a1.pdf [file c4py01683a1.pdf]

## Electronic Supplementary Information

### **Bis(2-oxoindolin-3-ylidene)-benzodifuran-dione-based D-A polymers for high-performance n-channel transistors**

Guobing Zhang,<sup>\*a,c</sup> Jinghua Guo,<sup>a,b</sup> Min Zhu,<sup>a,b</sup> Peng Li,<sup>a,b</sup> Hongbo Lu,<sup>a,c</sup> Kilwon Cho<sup>d</sup> <sup>c</sup> and Longzhen Qiu<sup>\*a,c</sup>

<sup>a</sup>Key Lab of Special Display Technology, Ministry of Education, National Engineering Lab of Special Display Technology, State Key Lab of Advanced Display Technology, Academy of Opto-Electronic Technology, Hefei University of Technology, Hefei, 230009, China. gbzhang@hfut.edu.cn, lzqiu@ustc.edu

<sup>b</sup>Department of Polymer Science and Engineering, School of Chemistry and Chemical Engineering, Hefei University of Technology, Hefei, 230009, China.

<sup>c</sup>Anhui Key Laboratory of Advanced Functional Materials and Devices, Hefei University of Technology, Hefei, 230009, China.

<sup>d</sup>Department of Chemical Engineering, Pohang University of Science and Technology, Pohang, 790-784, Korea.

**Table S1** Molecular weight and thermal properties of polymers

| Polymer           | M <sub>n</sub><br>(kDa) | Dispersity | Td <sup>a</sup><br>(°C) |
|-------------------|-------------------------|------------|-------------------------|
| <b>PBIBDF-TT</b>  | 26.47                   | 1.65       | 385                     |
| <b>PBIBDF-TVT</b> | 28.07                   | 1.72       | 389                     |
| <b>PBIBDF-TAT</b> | 23.95                   | 1.83       | 375                     |

<sup>a</sup> 5% weight loss temperatures measured by TGA under nitrogen atmosphere.

**Table S2** Crystallographic parameters for polymer films annealed at 150 (**PBIBDF-TT**) and 180 °C (**PBIBDF-TVT** and **PBIBDF-TAT**).

| Polymer           | Lamellar spacing                  |       | $\pi$ - $\pi$ spacing |       |
|-------------------|-----------------------------------|-------|-----------------------|-------|
|                   | q <sub>z</sub> (Å <sup>-1</sup> ) | d (Å) | q <sub>xy</sub>       | d (Å) |
| <b>PBIBDF-TT</b>  | 0.217                             | 28.96 | 1.82                  | 3.45  |
| <b>PBIBDF-TVT</b> | 0.213                             | 29.45 | 1.79                  | 3.51  |
| <b>PBIBDF-TAT</b> | 0.211                             | 29.83 | 1.80                  | 3.49  |

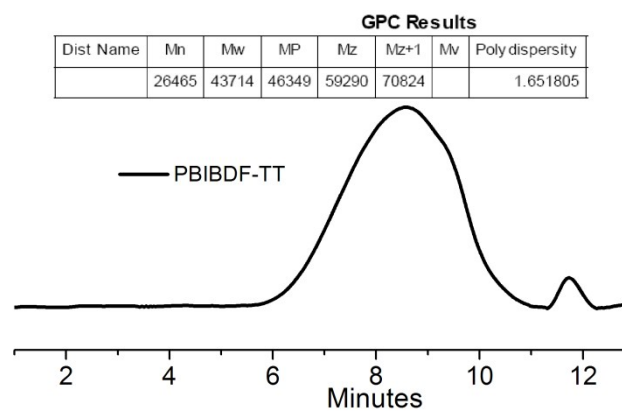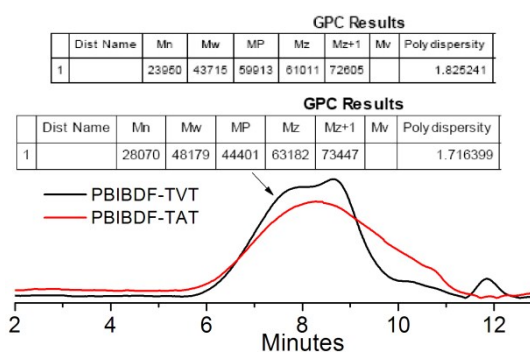

**Fig. S1** The GPC results of BIBDF-based polymers.

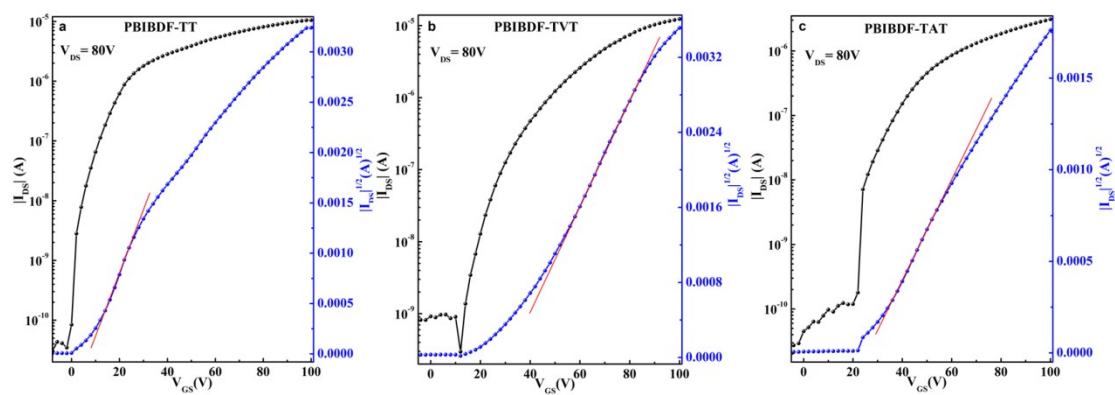

**Fig. S2** The transfer curves of OTS-modified OTFTs.

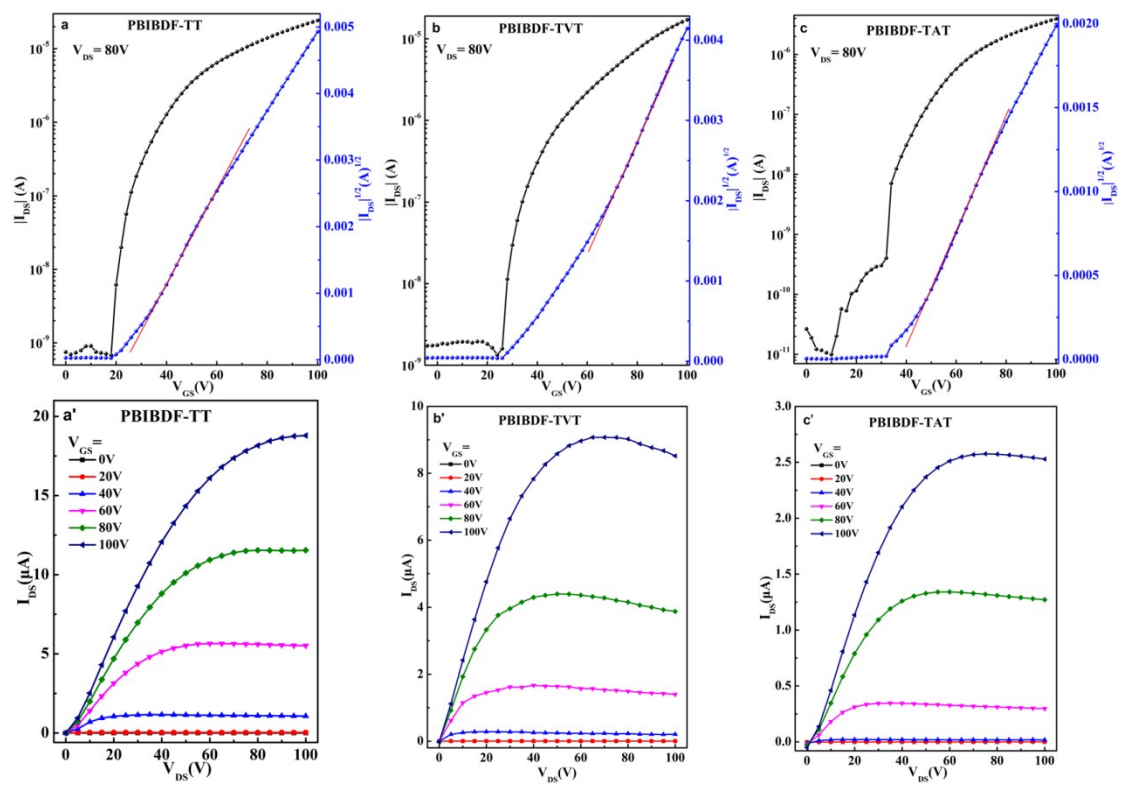

**Fig. S3** Output and transfer curves of Cytop-modified OTFTs without annealing.

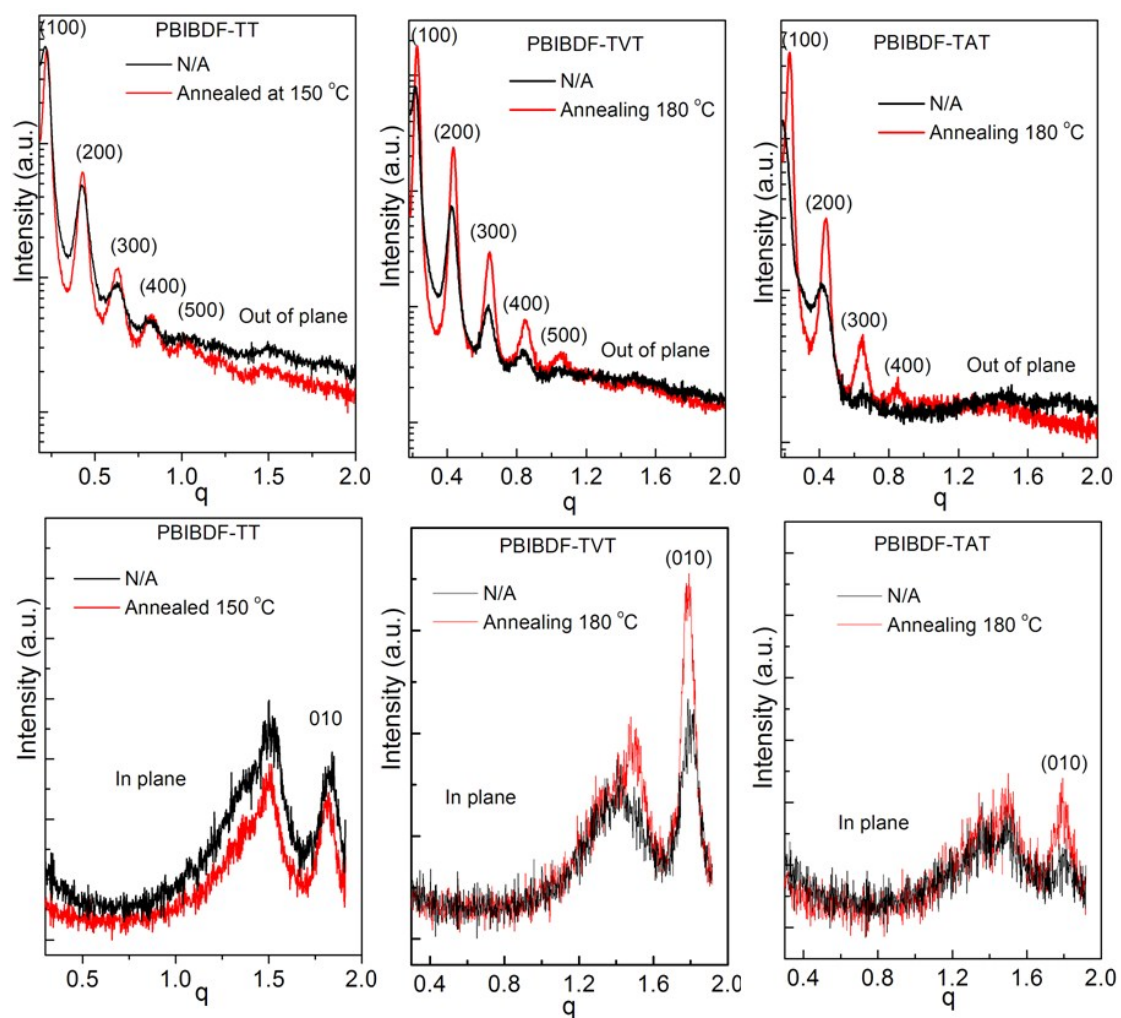

**Fig. S4** Out-of-plane and in plane line cuts of GIXD.

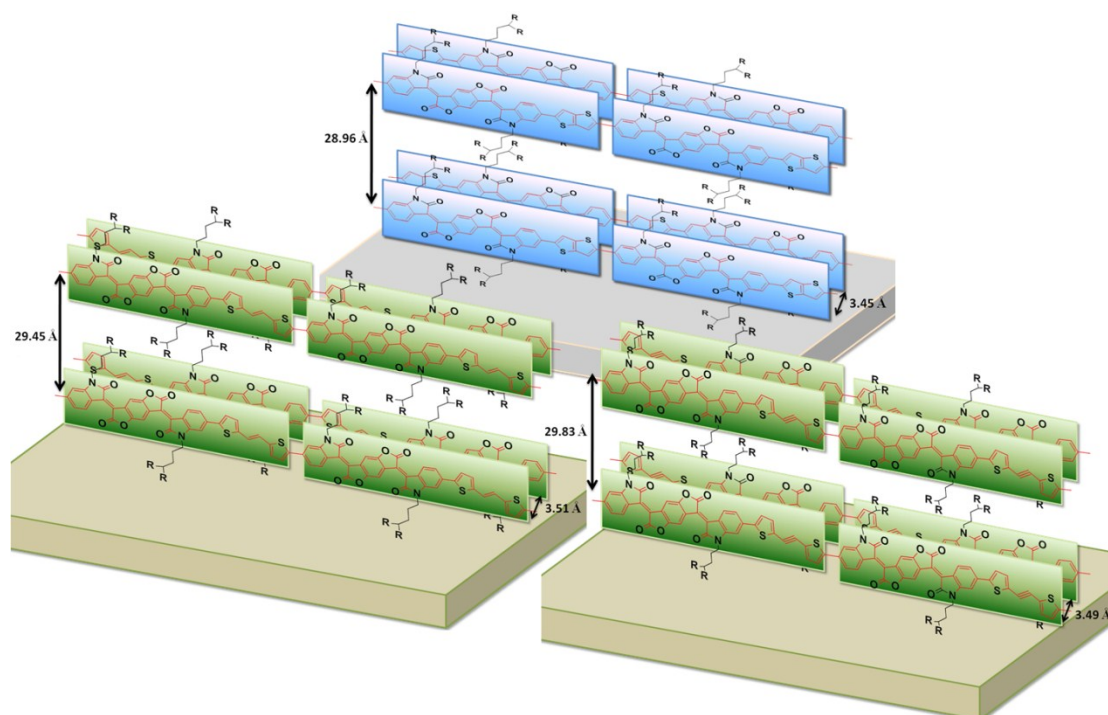

**Fig. S5** Proposed polymer packing model in the thin films of three BIBDF-based polymers.

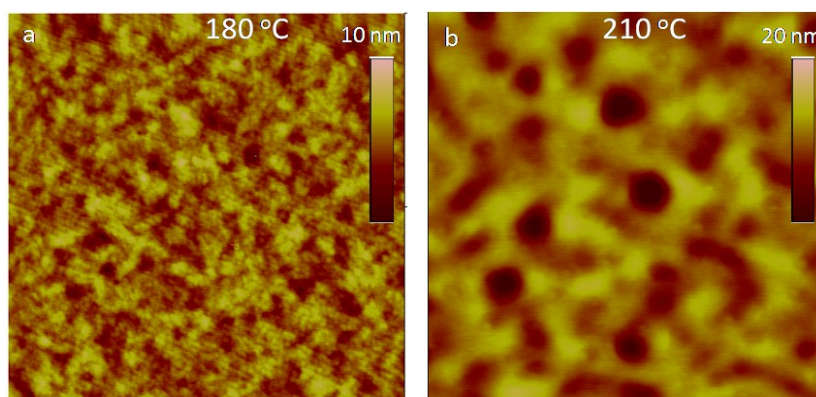

**Fig. S6** AFM topography images (2 μm×2 μm) of **PBIBDF-TT** films coated on Cytop-modified SiO<sub>2</sub>/Si substrates at different annealing temperature.

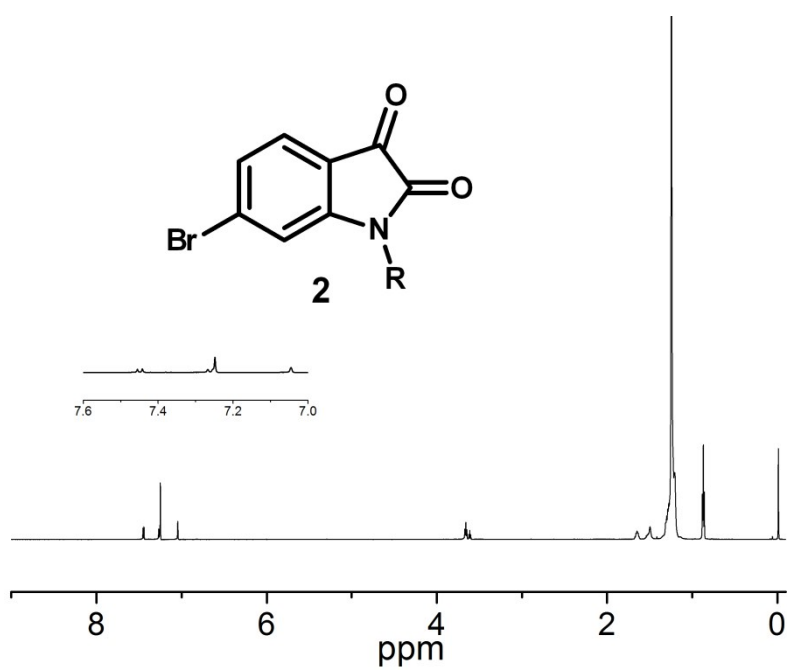

**Fig. S7**  $^1\text{H}$  NMR of compound **2** in  $\text{CDCl}_3$ .

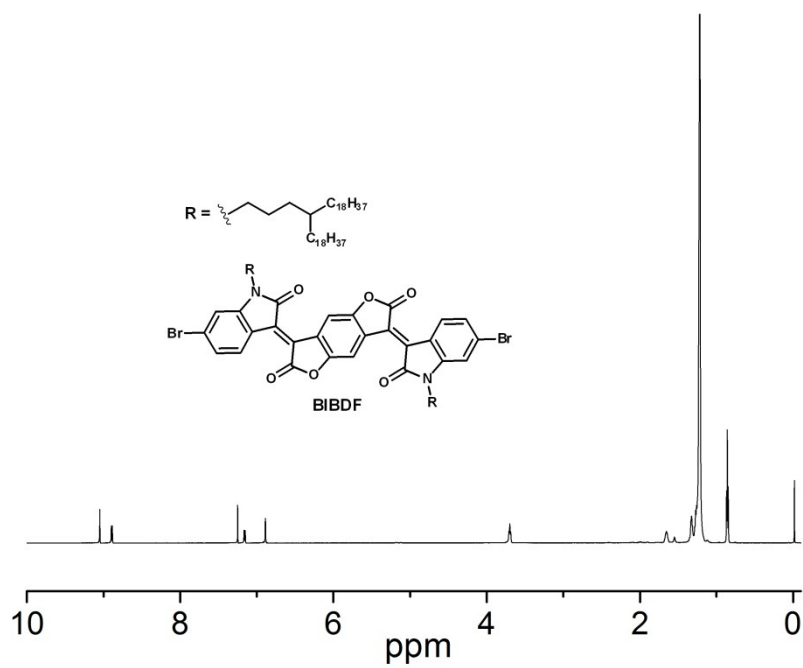

**Fig. S8**  $^1\text{H}$  NMR of BIBDF in  $\text{CDCl}_3$ .

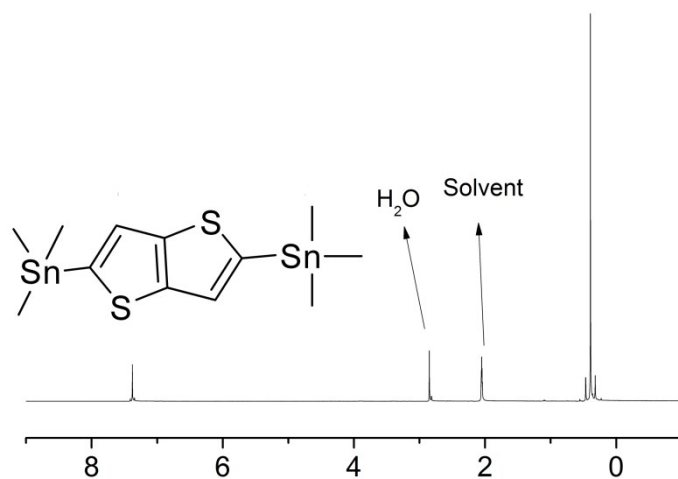

**Fig. S9**  $^1\text{H}$  NMR of **M1** in  $\text{C}_3\text{D}_6\text{O}$ .

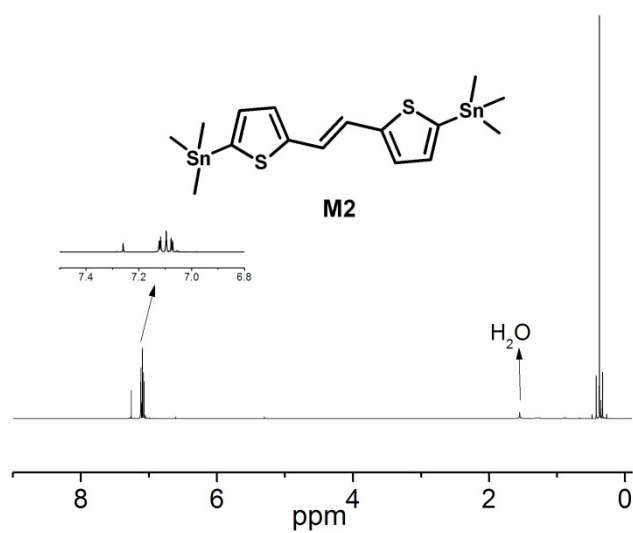

**Fig. S10**  $^1\text{H}$  NMR of **M2** in  $\text{CDCl}_3$ .

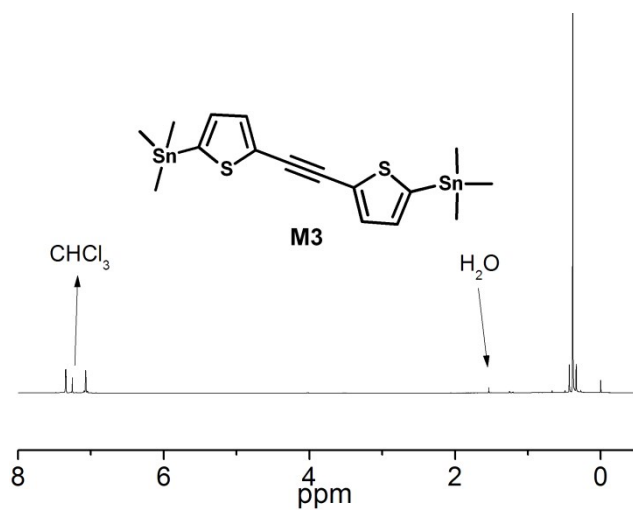

**Fig. S11**  $^1\text{H}$  NMR of **M3** in  $\text{CDCl}_3$ .



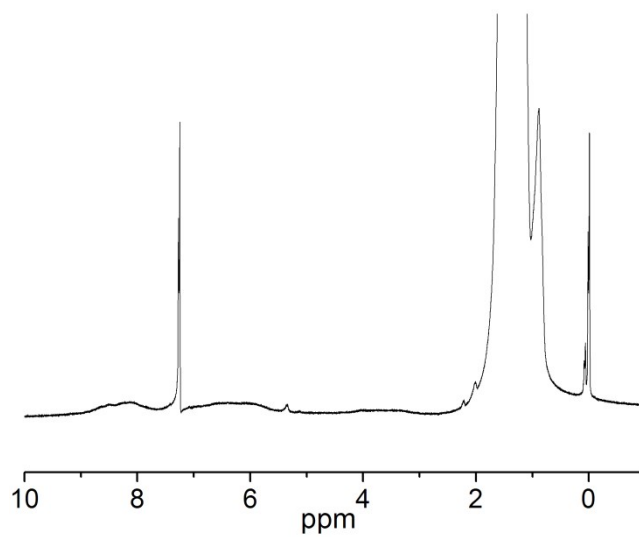

**Fig. S12**  $^1\text{H}$  NMR of polymer PBIBDF-TT in  $\text{CDCl}_3$ .

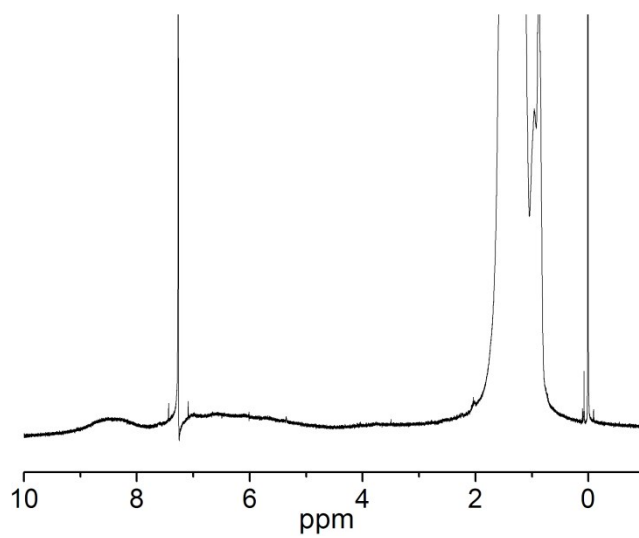

**Fig. S13**  $^1\text{H}$  NMR of polymer PBIBDF-TVT in  $\text{CDCl}_3$ .

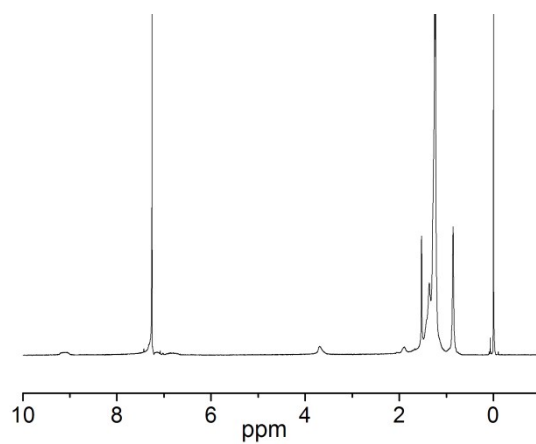

**Fig. S14**  $^1\text{H}$  NMR of polymer PBIBDF-TAT in  $\text{CDCl}_3$ .
